# Supplementary material for: Systematic Analysis of Genetic and Pathway Determinants of Eribulin Sensitivity across 100 Human Cancer Cell Lines from the Cancer Cell Line Encyclopedia (CCLE)
Source: MDPI journal article supplement (doi:10.3390/cancers14184532), 2022-09-19
Supplement: s1 [file s1]

# SUPPLEMENTAL FIGURES and TABLES

## SUPPLEMENTAL FIGURES

### Supplemental Figure S1

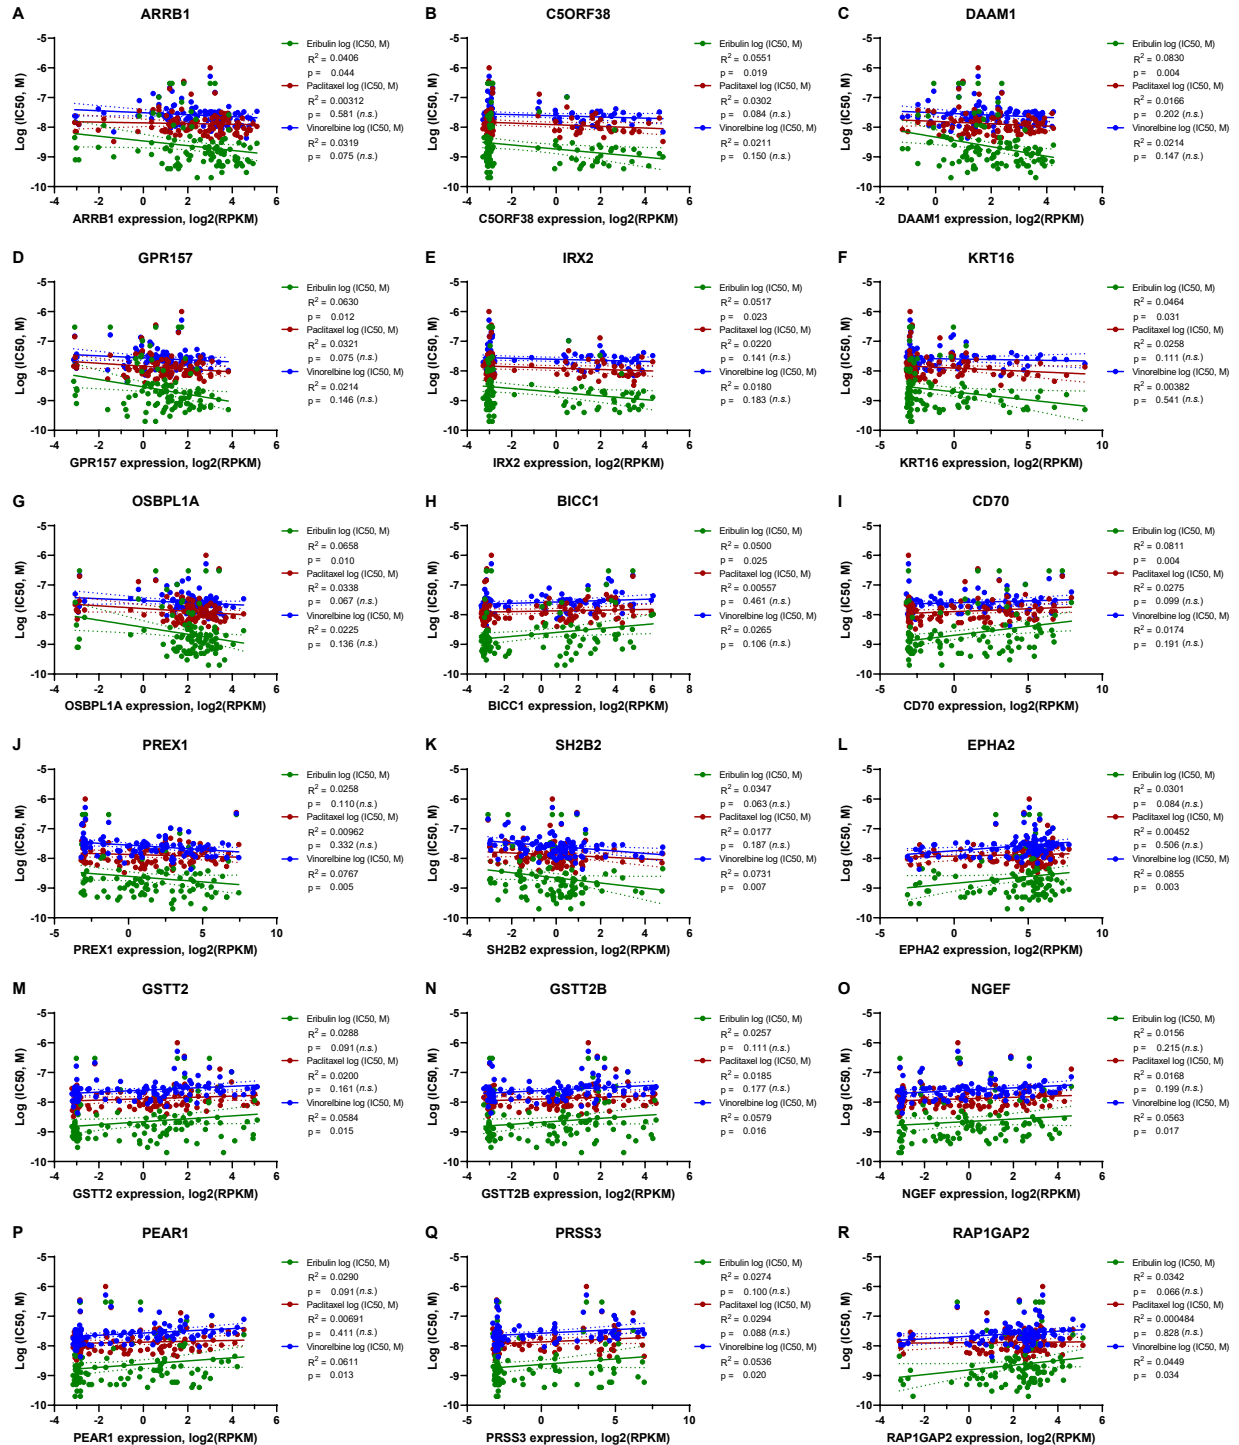

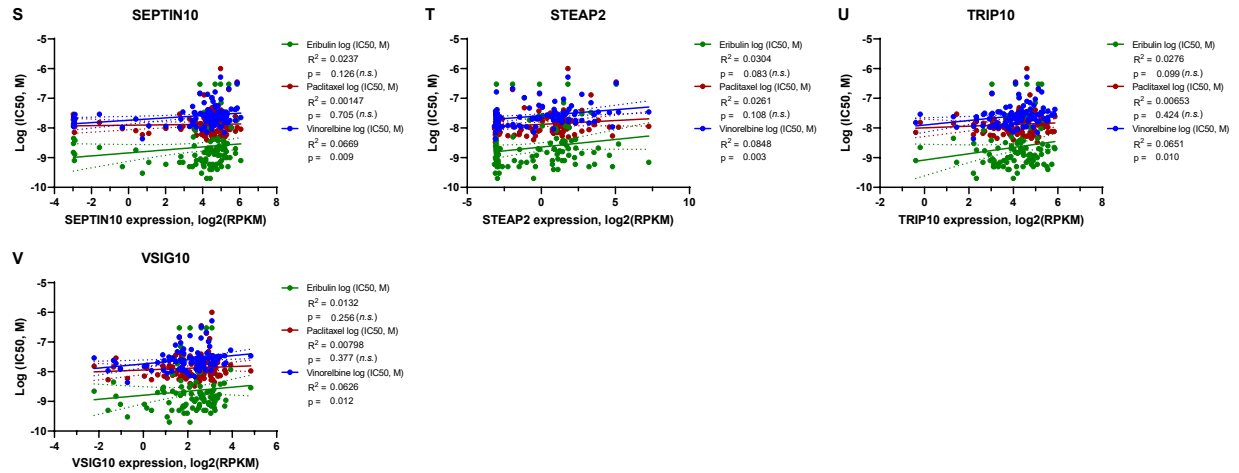

**Supplemental Figure S1.** Linear regression analyses of gene expression ( $\log_2[\text{RPKM}]$ ) versus  $\log[\text{M}]$  IC50 for eribulin and vinorelbine UFGs. (A-G), eribulin up genes; (H, I), eribulin down genes; (J, K), vinorelbine up genes; (L-V), vinorelbine down genes. Linear regression lines (solid) are shown together with their corresponding 95% confidence bands (dotted).

## Supplemental Figure S2

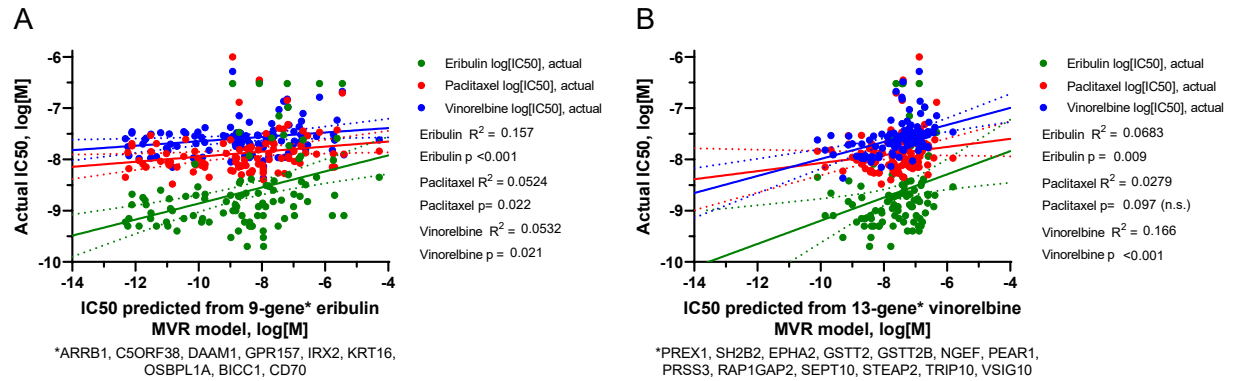

**Supplemental Figure S2.** Predicted versus actual IC<sub>50</sub>s based on full UFG set MVR models. Predicted IC<sub>50</sub>s were derived from (A) all 9 eribulin UGFs, and (B) all 13 vinorelbine UGFs. Linear regression lines (solid) are shown together with their corresponding 95% confidence bands (dotted). For visual comparison, scales of x- and y-axes were kept the same between both panels here and Panels A and C of Figure 5.

# SUPPLEMENTAL TABLES

| Supplemental Table S1: 100 CCL cell lines and their antiproliferative IC50s against eribulin, paclitaxel and vinorelbine |                            |                  |                    |             |            |                   |                  |            |             |
|--------------------------------------------------------------------------------------------------------------------------|----------------------------|------------------|--------------------|-------------|------------|-------------------|------------------|------------|-------------|
| Cell line                                                                                                                | Tissue of origin           | IC50, nM         |                    |             | Cell line  | Tissue of origin  | IC50, nM         |            |             |
|                                                                                                                          |                            | Eribulin         | Paclitaxel         | Vinorelbine |            |                   | Eribulin         | Paclitaxel | Vinorelbine |
| 769-P                                                                                                                    | Kidney                     | 301 <sup>1</sup> | 33.9               | 163.7       | LoVo       | Colorectum        | 4.1              | 17.5       | 17.9        |
| 786-O                                                                                                                    | Kidney                     | 301 <sup>1</sup> | 197.1              | 212.4       | Malme-3M   | Lung              | 0.2              | 16.2       | 23.8        |
| 8305C                                                                                                                    | H&N <sup>2</sup> -thyroid  | 3.1              | 31.8               | 25.1        | MCF7       | Breast            | 1.8              | 8.1        | 20          |
| A2058                                                                                                                    | Skin                       | 0.2              | 4                  | 7.3         | MES-SA     | Uterus            | 2.5              | 15.8       | 36.9        |
| A253                                                                                                                     | H&N <sup>2</sup> -salivary | 1.6              | 7.2                | 24.4        | MeWo       | Skin              | 2                | 7.8        | 20.3        |
| A2780                                                                                                                    | Ovary                      | 1.9              | 8.4                | 21.6        | MIA PaCa-2 | Pancreas          | 0.6              | 14.6       | 20.6        |
| A-375                                                                                                                    | Skin                       | 5                | 11.3               | 13.2        | MKN45      | Gastric/esophagus | 0.6              | 4.5        | 15.1        |
| A498                                                                                                                     | Kidney                     | 25.7             | 37.5               | 58.4        | NALM-6     | Blood             | 1.3              | 11         | 20.2        |
| A549                                                                                                                     | Lung                       | 3.7              | 18.1               | 55.8        | NB4        | Blood             | 0.3              | 5.9        | 4.3         |
| A-673 <sup>3</sup>                                                                                                       | ST <sup>4</sup> /muscle    | 0.5              | 5.4                | 10.8        | NCI-H1373  | Lung              | 33.7             | 130        | 70.9        |
| AN3 CA                                                                                                                   | Uterus                     | 0.8              | 10.3               | 29.8        | NCI-H1650  | Lung              | 1.3              | 7.1        | 26          |
| AsPC-1                                                                                                                   | Pancreas                   | 2.9              | 10.6               | 34.2        | NCI-H322   | Lung              | 1.9              | 24.6       | 32.1        |
| AU565                                                                                                                    | Breast                     | 0.7              | 6.6                | 11.8        | NCI-H441   | Lung              | 0.6              | 13         | 16.6        |
| BT-20                                                                                                                    | Breast                     | 1.3              | 20.4               | 32.6        | NCI-H446   | Lung              | 0.3              | 6.1        | 8.9         |
| BT-474                                                                                                                   | Breast                     | 0.7              | 29.5               | 10.6        | NCI-H460   | Lung              | 1.9              | 7.1        | 23.4        |
| BT-549                                                                                                                   | Breast                     | 2                | 7.1                | 23.7        | NCI-H508   | Colorectum        | 11.7             | 16.8       | 53.2        |
| BxPC-3                                                                                                                   | Pancreas                   | 0.6              | 7.6                | 26.9        | NCI-H522   | Lung              | 1                | 8.9        | 17.9        |
| CADO-ES1                                                                                                                 | Bone                       | 301 <sup>1</sup> | 353.6              | 325.6       | NCI-H716   | Colorectum        | 301 <sup>1</sup> | 142.4      | 149.6       |
| Caki-1                                                                                                                   | Kidney                     | 9.6              | 12.9               | 30.5        | NCI-N87    | Gastric/esophagus | 0.5              | 8.8        | 14.8        |
| Caki-2                                                                                                                   | Kidney                     | 3.2              | 13.4               | 15.7        | NOMO-1     | Blood             | 3                | 13.2       | 11.3        |
| CAL-51                                                                                                                   | Breast                     | 2.1              | 14.4               | 35          | OE19       | Gastric/esophagus | 0.6              | 4.5        | 25.4        |
| Calu-1                                                                                                                   | Lung                       | 2                | 24.2               | 42.2        | OVCAR-4    | Ovary             | 2.2              | 7.6        | 28.9        |
| Calu-3                                                                                                                   | Lung                       | 29.9             | 39.1               | 136.3       | OVCAR-8    | Ovary             | 18.5             | 10.4       | 46.9        |
| Calu-6                                                                                                                   | Lung                       | 0.5              | 6                  | 12.2        | PANC-1     | Pancreas          | 0.8              | 7.5        | 21.5        |
| CAMA-1                                                                                                                   | Breast                     | 0.9              | 14.1               | 31.2        | PC-3       | Prostate          | 0.9              | 20.5       | 29.2        |
| Caov-3                                                                                                                   | Ovary                      | 1.4              | 7.8                | 17.8        | Pfeiffer   | Blood             | 0.8              | 12.7       | 12.3        |
| Capan-1                                                                                                                  | Pancreas                   | 1.2              | 10.7               | 33.1        | PLC/PRF/5  | Liver             | 1.5              | 21.3       | 27.3        |
| Capan-2                                                                                                                  | Pancreas                   | 1.5              | 13.1               | 28.1        | Raji       | Blood             | 4.5              | 14.5       | 24          |
| Daudi                                                                                                                    | Blood                      | 0.8              | 7.1                | 15.2        | RT4        | Bladder           | 3.8              | 7.3        | 32.6        |
| DU 145                                                                                                                   | Prostate                   | 1.6              | 10.5               | 22.9        | SK-BR-3    | Breast            | 0.5              | 9.5        | 10.4        |
| ES-2                                                                                                                     | Ovary                      | 23.9             | 35.7               | 78.8        | SK-HEP-1   | Liver             | 4.5              | 12.7       | 28          |
| FaDu                                                                                                                     | H&N <sup>2</sup> -pharynx  | 2.1              | 8                  | 41.7        | SK-LMS-1   | Vulva             | 11.5             | 18.9       | 30.3        |
| HCC1187                                                                                                                  | Breast                     | 0.7              | 8.7                | 11          | SK-MEL-28  | Skin              | 0.5              | 5.5        | 12.1        |
| HCC1428                                                                                                                  | Breast                     | 0.5              | 20.3               | 11.3        | SK-MEL-5   | Skin              | 0.8              | 5.7        | 10.7        |
| HCC-15                                                                                                                   | Lung                       | 1                | 5.9                | 28.3        | SK-MES-1   | Lung              | 3.5              | 15.6       | 28.4        |
| HCC1806                                                                                                                  | Breast                     | 0.4              | 7.1                | 18.1        | SK-OV-3    | Ovary             | 1.2              | 20.3       | 21.4        |
| HCC1937                                                                                                                  | Breast                     | 0.5              | 13.6               | 17.6        | SK-UT-1    | Uterus            | 1.2              | 8.1        | 20.1        |
| HCT 116                                                                                                                  | Colorectum                 | 2                | 5                  | 17          | SW1353     | Bone              | 3                | 9.9        | 30.4        |
| HCT-15                                                                                                                   | Colorectum                 | 301 <sup>1</sup> | 1,001 <sup>5</sup> | 518.2       | SW48       | Colorectum        | 0.4              | 7.7        | 18.5        |
| HEC-1-A                                                                                                                  | Uterus                     | 0.8              | 9.1                | 22.6        | SW480      | Colorectum        | 2.1              | 18.3       | 34.8        |
| HEC-1-B                                                                                                                  | Uterus                     | 0.7              | 5.3                | 11          | T24        | Bladder           | 103.4            | 48         | 105.5       |
| Hep G2                                                                                                                   | Liver                      | 26.2             | 21.9               | 49.9        | T47D       | Breast            | 2.5              | 9.2        | 33          |
| HL-60                                                                                                                    | Blood                      | 2.2              | 15.3               | 29.1        | THP-1      | Blood             | 3.8              | 19.8       | 28.6        |

|                                                                                                                                                                                                                                                                                                                                                                                                                                                                                                                                                                                                                                                                                                                                                                                                                                                                                                                                                                       |                              |     |      |      |          |        |      |      |      |
|-----------------------------------------------------------------------------------------------------------------------------------------------------------------------------------------------------------------------------------------------------------------------------------------------------------------------------------------------------------------------------------------------------------------------------------------------------------------------------------------------------------------------------------------------------------------------------------------------------------------------------------------------------------------------------------------------------------------------------------------------------------------------------------------------------------------------------------------------------------------------------------------------------------------------------------------------------------------------|------------------------------|-----|------|------|----------|--------|------|------|------|
| Hs 578T                                                                                                                                                                                                                                                                                                                                                                                                                                                                                                                                                                                                                                                                                                                                                                                                                                                                                                                                                               | Breast                       | 0.5 | 5.4  | 10.8 | TOV-21G  | Ovary  | 10.3 | 10.4 | 43.4 |
| HT-1080                                                                                                                                                                                                                                                                                                                                                                                                                                                                                                                                                                                                                                                                                                                                                                                                                                                                                                                                                               | ST <sup>4</sup> /fibroblasts | 0.4 | 6.6  | 9.3  | U-2 OS   | Bone   | 70.2 | 40.5 | 93.8 |
| HT-29                                                                                                                                                                                                                                                                                                                                                                                                                                                                                                                                                                                                                                                                                                                                                                                                                                                                                                                                                                 | Colorectum                   | 1.7 | 7    | 21.5 | U-87 MG  | Brain  | 1.2  | 15   | 19.7 |
| K-562                                                                                                                                                                                                                                                                                                                                                                                                                                                                                                                                                                                                                                                                                                                                                                                                                                                                                                                                                                 | Blood                        | 1.5 | 29   | 19.1 | U-937    | Blood  | 0.6  | 9.7  | 11.5 |
| KP4                                                                                                                                                                                                                                                                                                                                                                                                                                                                                                                                                                                                                                                                                                                                                                                                                                                                                                                                                                   | Pancreas                     | 0.8 | 5.4  | 17   | UACC-812 | Breast | 1.7  | 7.7  | 31.4 |
| KYSE-150                                                                                                                                                                                                                                                                                                                                                                                                                                                                                                                                                                                                                                                                                                                                                                                                                                                                                                                                                              | Gastric/esophagus            | 1   | 3.3  | 7    | ZR-75-1  | Breast | 1.1  | 9    | 19.9 |
| LNCaP <sup>6</sup>                                                                                                                                                                                                                                                                                                                                                                                                                                                                                                                                                                                                                                                                                                                                                                                                                                                                                                                                                    | Prostate                     | 0.7 | 11.4 | 34.6 | ZR-75-30 | Breast | 8.1  | 14.4 | 28.5 |
| <p>Supplemental Table S1 footnotes:</p> <p><sup>1</sup> Eribulin IC50s for 5 cell lines (769P, 786-O, CADO-ES1, HCT15, NCI-H716) exceeded 300 nM, the top eribulin concentration tested. Therefore, IC50s of 301 nM for eribulin were assigned for these 5 cell lines.</p> <p><sup>2</sup> H&amp;N: head &amp; neck cancer with tissue of origin as identified.</p> <p><sup>3</sup> A-673 cell line was originally identified as rhabdomyosarcoma, but molecular cytogenetic characterization revealed it to be Ewing's Sarcoma (<a href="https://doi.org/10.1016/s0165-4608(03)00209-7">https://doi.org/10.1016/s0165-4608(03)00209-7</a>). Muscle as tissue of origin remains correct.</p> <p><sup>4</sup> ST: soft tissue.</p> <p><sup>5</sup> Paclitaxel IC50 for HCT-15 cell line exceeded 1,000 nM, the top paclitaxel concentration tested. Therefore, the paclitaxel IC50 was assigned as 1,001 nM for HCT-15 cells.</p> <p><sup>6</sup> LNCaP clone FGC.</p> |                              |     |      |      |          |        |      |      |      |

| Supplemental Table 2. Genes positively and negatively associated with responses to eribulin, paclitaxel and vinorelbine at p < 0.0025 stringency <sup>1</sup> |             |                              |         |                       |             |                              |         |                       |             |                              |         |
|---------------------------------------------------------------------------------------------------------------------------------------------------------------|-------------|------------------------------|---------|-----------------------|-------------|------------------------------|---------|-----------------------|-------------|------------------------------|---------|
| Eribulin (n = 61)                                                                                                                                             |             |                              |         | Paclitaxel (n = 30)   |             |                              |         | Vinorelbine (n = 90)  |             |                              |         |
| Gene                                                                                                                                                          | Up/<br>down | Fold-<br>change <sup>2</sup> | p value | Gene                  | Up/<br>down | Fold-<br>change <sup>2</sup> | p value | Gene                  | Up/<br>down | Fold-<br>change <sup>2</sup> | p value |
| MAGEA3                                                                                                                                                        | Up          | 10.41285                     | 0.00134 | PPARGC1B <sup>4</sup> | Up          | 2.95803                      | 0.00011 | PREX1                 | Up          | 6.68057                      | 0.00246 |
| MAGEA2B                                                                                                                                                       | Up          | 6.38014                      | 0.00213 | ANKRD13B              | Up          | 1.99038                      | 0.00225 | ST6GAL1               | Up          | 5.38768                      | 0.00080 |
| CSAG1                                                                                                                                                         | Up          | 6.17522                      | 0.00241 | NCOA7                 | Up          | 1.91750                      | 0.00066 | TIAM1                 | Up          | 3.72193                      | 0.00155 |
| KRT16                                                                                                                                                         | Up          | 5.99757                      | 0.00156 | SLC35G1               | Up          | 1.75572                      | 0.00151 | FAM46C                | Up          | 3.35909                      | 0.00142 |
| NOTCH3                                                                                                                                                        | Up          | 5.24506                      | 0.00238 | SREBF1                | Up          | 1.75556                      | 0.00247 | IRX5                  | Up          | 3.18898                      | 0.00216 |
| TRIB2                                                                                                                                                         | Up          | 4.56321                      | 0.00117 | SCO1                  | Up          | 1.60907                      | 0.00016 | SH2B2                 | Up          | 2.74440                      | 0.00098 |
| LYPD6B                                                                                                                                                        | Up          | 4.53307                      | 0.00085 | PDCD11                | Up          | 1.56304                      | 0.00142 | MYLIP <sup>3</sup>    | Up          | 2.70301                      | 0.00003 |
| B4GALNT3                                                                                                                                                      | Up          | 4.40125                      | 0.00241 | GID4                  | Up          | 1.54735                      | 0.00055 | PPARGC1B <sup>4</sup> | Up          | 2.68743                      | 0.00030 |
| IRX2                                                                                                                                                          | Up          | 4.36570                      | 0.00202 | COX10                 | Up          | 1.54379                      | 0.00025 | SH3BP5                | Up          | 2.32253                      | 0.00162 |
| C5ORF38                                                                                                                                                       | Up          | 4.10552                      | 0.00133 | RAI1                  | Up          | 1.54306                      | 0.00238 | ST3GAL4 <sup>3</sup>  | Up          | 2.26131                      | 0.00120 |
| CD82                                                                                                                                                          | Up          | 3.29160                      | 0.00214 | RIOK1                 | Up          | 1.53980                      | 0.00078 | TNK2-AS1              | Up          | 2.15335                      | 0.00181 |
| ARRB1                                                                                                                                                         | Up          | 2.90224                      | 0.00030 | TOP3A                 | Up          | 1.51873                      | 0.00019 | PDCD4                 | Up          | 2.11284                      | 0.00158 |
| KAZN                                                                                                                                                          | Up          | 2.78359                      | 0.00136 | C1QB                  | Up          | 1.49609                      | 0.00218 | NBP2P                 | Up          | 2.07988                      | 0.00135 |
| ADSSL1                                                                                                                                                        | Up          | 2.77511                      | 0.00100 | NEURL4                | Up          | 1.49144                      | 0.00023 | KLHL24 <sup>3</sup>   | Up          | 2.01032                      | 0.00133 |
| DBP                                                                                                                                                           | Up          | 2.71818                      | 0.00160 | ZNF18                 | Up          | 1.46126                      | 0.00188 | TRIM62                | Up          | 1.97540                      | 0.00112 |
| LY6E                                                                                                                                                          | Up          | 2.63749                      | 0.00191 | METTL16               | Up          | 1.46050                      | 0.00049 | JARID2                | Up          | 1.90211                      | 0.00182 |
| OSBPL1A                                                                                                                                                       | Up          | 2.43903                      | 0.00210 | MYBBP1A               | Up          | 1.44647                      | 0.00216 | SMAP2                 | Up          | 1.85346                      | 0.00044 |
| GPR157                                                                                                                                                        | Up          | 2.34839                      | 0.00165 | POLR2A                | Up          | 1.43184                      | 0.00192 | MYO9B                 | Up          | 1.79954                      | 0.00005 |
| MYLIP <sup>3</sup>                                                                                                                                            | Up          | 2.23753                      | 0.00060 | DHX33                 | Up          | 1.42273                      | 0.00185 | CTU1 <sup>3</sup>     | Up          | 1.70662                      | 0.00027 |
| ST3GAL4 <sup>3</sup>                                                                                                                                          | Up          | 2.20709                      | 0.00107 | AKAP10                | Up          | 1.39159                      | 0.00105 | ZNF316                | Up          | 1.68257                      | 0.00145 |
| KLHL24 <sup>3</sup>                                                                                                                                           | Up          | 2.14127                      | 0.00016 | TNKS2                 | Up          | 1.36832                      | 0.00118 | RELT                  | Up          | 1.67809                      | 0.00091 |
| DAAM1                                                                                                                                                         | Up          | 2.13846                      | 0.00133 | PELP1                 | Up          | 1.35760                      | 0.00160 | IRF2BP1               | Up          | 1.64703                      | 0.00048 |
| TNK2                                                                                                                                                          | Up          | 2.07354                      | 0.00024 | CLGN                  | Down        | 0.20938                      | 0.00014 | RCC2 <sup>3</sup>     | Up          | 1.63862                      | 0.00025 |
| CHKA                                                                                                                                                          | Up          | 1.80613                      | 0.00156 | BEX5                  | Down        | 0.31781                      | 0.00222 | ENTPD1                | Up          | 1.63520                      | 0.00222 |
| CBX4                                                                                                                                                          | Up          | 1.80410                      | 0.00074 | BEND7                 | Down        | 0.32171                      | 0.00112 | ZNF324B               | Up          | 1.63466                      | 0.00167 |
| ERCC6                                                                                                                                                         | Up          | 1.69932                      | 0.00113 | NRIP1                 | Down        | 0.34062                      | 0.00210 | LYPLA2P1              | Up          | 1.62049                      | 0.00133 |
| MCCC1                                                                                                                                                         | Up          | 1.65605                      | 0.00096 | SUSD1                 | Down        | 0.43313                      | 0.00190 | DOT1L                 | Up          | 1.59021                      | 0.00195 |
| SUV420H2                                                                                                                                                      | Up          | 1.65596                      | 0.00169 | MYL6                  | Down        | 0.62106                      | 0.00055 | LIG1                  | Up          | 1.58071                      | 0.00169 |
| RCC2 <sup>3</sup>                                                                                                                                             | Up          | 1.64415                      | 0.00038 | MCFD2                 | Down        | 0.62650                      | 0.00092 | DDI2                  | Up          | 1.57856                      | 0.00075 |
| INAFM1                                                                                                                                                        | Up          | 1.63668                      | 0.00100 | SNF8                  | Down        | 0.65228                      | 0.00046 | CSK                   | Up          | 1.56816                      | 0.00149 |
| BRWD1                                                                                                                                                         | Up          | 1.59865                      | 0.00092 |                       |             |                              |         | ZBTB48                | Up          | 1.53591                      | 0.00201 |
| CTU1 <sup>3</sup>                                                                                                                                             | Up          | 1.58029                      | 0.00056 |                       |             |                              |         | FARSA                 | Up          | 1.52700                      | 0.00085 |
| VPS13D                                                                                                                                                        | Up          | 1.54855                      | 0.00035 |                       |             |                              |         | FBXO46                | Up          | 1.51772                      | 0.00202 |
| CC2D1A                                                                                                                                                        | Up          | 1.47589                      | 0.00081 |                       |             |                              |         | DENND4B               | Up          | 1.51148                      | 0.00086 |
| RANBP9                                                                                                                                                        | Up          | 1.45607                      | 0.00127 |                       |             |                              |         | MYPOP                 | Up          | 1.51067                      | 0.00180 |
| ACAP2                                                                                                                                                         | Up          | 1.44057                      | 0.00114 |                       |             |                              |         | KMT2B                 | Up          | 1.49452                      | 0.00040 |
| DVL3                                                                                                                                                          | Up          | 1.43862                      | 0.00107 |                       |             |                              |         | ELL                   | Up          | 1.49166                      | 0.00125 |
| YEATS2-AS1                                                                                                                                                    | Up          | 1.43188                      | 0.00183 |                       |             |                              |         | TRMT2A                | Up          | 1.47309                      | 0.00066 |
| AKAP8L <sup>3</sup>                                                                                                                                           | Up          | 1.37659                      | 0.00070 |                       |             |                              |         | MAU2                  | Up          | 1.47040                      | 0.00072 |
| OPA1                                                                                                                                                          | Up          | 1.33365                      | 0.00243 |                       |             |                              |         | DDX49                 | Up          | 1.45256                      | 0.00045 |
| CD70                                                                                                                                                          | Down        | 0.11046                      | 0.00056 |                       |             |                              |         | DCPS                  | Up          | 1.45039                      | 0.00234 |
| BCAT1                                                                                                                                                         | Down        | 0.15199                      | 0.00129 |                       |             |                              |         | CHERP                 | Up          | 1.44976                      | 0.00132 |
| PAPSS2                                                                                                                                                        | Down        | 0.16298                      | 0.00041 |                       |             |                              |         | PPP6R1                | Up          | 1.43986                      | 0.00039 |
| BICC1                                                                                                                                                         | Down        | 0.19316                      | 0.00242 |                       |             |                              |         | CLASRP                | Up          | 1.43224                      | 0.00022 |
| PLAGL1 <sup>3</sup>                                                                                                                                           | Down        | 0.23053                      | 0.00072 |                       |             |                              |         | ZBTB17                | Up          | 1.42310                      | 0.00060 |
| GLIS3                                                                                                                                                         | Down        | 0.26087                      | 0.00096 |                       |             |                              |         | BRD4                  | Up          | 1.41577                      | 0.00144 |
| PRKAA2                                                                                                                                                        | Down        | 0.28228                      | 0.00128 |                       |             |                              |         | CDK11A                | Up          | 1.41249                      | 0.00015 |
| SPDL1                                                                                                                                                         | Down        | 0.56734                      | 0.00165 |                       |             |                              |         | C19ORF47              | Up          | 1.40535                      | 0.00115 |
| CCNG1                                                                                                                                                         | Down        | 0.61505                      | 0.00248 |                       |             |                              |         | AKAP8L <sup>3</sup>   | Up          | 1.39218                      | 0.00181 |
| RPL26L1                                                                                                                                                       | Down        | 0.64151                      | 0.00176 |                       |             |                              |         | CRTC2                 | Up          | 1.38189                      | 0.00202 |
| BAX                                                                                                                                                           | Down        | 0.64194                      | 0.00120 |                       |             |                              |         | ZNF574                | Up          | 1.34107                      | 0.00231 |
| MRPL23                                                                                                                                                        | Down        | 0.64885                      | 0.00072 |                       |             |                              |         | UpF1                  | Up          | 1.32462                      | 0.00207 |
| TM2D2 <sup>3</sup>                                                                                                                                            | Down        | 0.65367                      | 0.00150 |                       |             |                              |         | SUpT5H                | Up          | 1.32111                      | 0.00028 |
| NSA2                                                                                                                                                          | Down        | 0.67086                      | 0.00080 |                       |             |                              |         | CPSF3L                | Up          | 1.30310                      | 0.00176 |

|                   |      |         |         |  |  |  |  |                     |      |         |         |
|-------------------|------|---------|---------|--|--|--|--|---------------------|------|---------|---------|
| ARPC3             | Down | 0.70837 | 0.00217 |  |  |  |  | CDK11B              | Up   | 1.27667 | 0.00166 |
| EIF3F             | Down | 0.71221 | 0.00095 |  |  |  |  | CXCL5               | Down | 0.07873 | 0.00044 |
| SYS1 <sup>3</sup> | Down | 0.72230 | 0.00247 |  |  |  |  | EREG                | Down | 0.10330 | 0.00068 |
| PWP1              | Down | 0.72585 | 0.00150 |  |  |  |  | TFPI                | Down | 0.11182 | 0.00063 |
| SLC25A3           | Down | 0.72615 | 0.00171 |  |  |  |  | WBP5                | Down | 0.13172 | 0.00023 |
| WBP4              | Down | 0.72869 | 0.00191 |  |  |  |  | HKDC1               | Down | 0.14089 | 0.00179 |
| TMEM18            | Down | 0.75115 | 0.00167 |  |  |  |  | DMTN                | Down | 0.14112 | 0.00005 |
|                   |      |         |         |  |  |  |  | MYEOV               | Down | 0.14965 | 0.00096 |
|                   |      |         |         |  |  |  |  | PRSS3               | Down | 0.16110 | 0.00236 |
|                   |      |         |         |  |  |  |  | PEAR1               | Down | 0.17729 | 0.00005 |
|                   |      |         |         |  |  |  |  | GSTT2               | Down | 0.19311 | 0.00011 |
|                   |      |         |         |  |  |  |  | EPHA2               | Down | 0.19348 | 0.00131 |
|                   |      |         |         |  |  |  |  | STEAP2              | Down | 0.20830 | 0.00215 |
|                   |      |         |         |  |  |  |  | PLAGL1 <sup>3</sup> | Down | 0.21890 | 0.00143 |
|                   |      |         |         |  |  |  |  | NGEF                | Down | 0.21979 | 0.00060 |
|                   |      |         |         |  |  |  |  | GSTT2B              | Down | 0.22069 | 0.00012 |
|                   |      |         |         |  |  |  |  | MARC2               | Down | 0.26060 | 0.00200 |
|                   |      |         |         |  |  |  |  | LARP6               | Down | 0.28767 | 0.00223 |
|                   |      |         |         |  |  |  |  | SEPTIN10            | Down | 0.29663 | 0.00183 |
|                   |      |         |         |  |  |  |  | PDGFA               | Down | 0.30467 | 0.00220 |
|                   |      |         |         |  |  |  |  | RAP1GAP2            | Down | 0.35885 | 0.00191 |
|                   |      |         |         |  |  |  |  | ADAM9               | Down | 0.38507 | 0.00026 |
|                   |      |         |         |  |  |  |  | LRRC49              | Down | 0.40109 | 0.00069 |
|                   |      |         |         |  |  |  |  | TRIP10              | Down | 0.47549 | 0.00029 |
|                   |      |         |         |  |  |  |  | VSIG10              | Down | 0.47800 | 0.00099 |
|                   |      |         |         |  |  |  |  | TAX1BP3             | Down | 0.51789 | 0.00116 |
|                   |      |         |         |  |  |  |  | TM2D2 <sup>3</sup>  | Down | 0.52379 | 0.00001 |
|                   |      |         |         |  |  |  |  | SPA17               | Down | 0.54261 | 0.00199 |
|                   |      |         |         |  |  |  |  | TLDC1               | Down | 0.55524 | 0.00189 |
|                   |      |         |         |  |  |  |  | HSDL2               | Down | 0.63273 | 0.00114 |
|                   |      |         |         |  |  |  |  | AP2B1               | Down | 0.64461 | 0.00144 |
|                   |      |         |         |  |  |  |  | CGRRF1              | Down | 0.65046 | 0.00083 |
|                   |      |         |         |  |  |  |  | SYS1 <sup>3</sup>   | Down | 0.65473 | 0.00059 |
|                   |      |         |         |  |  |  |  | BOD1                | Down | 0.69145 | 0.00030 |
|                   |      |         |         |  |  |  |  | CASC4               | Down | 0.71204 | 0.00162 |
|                   |      |         |         |  |  |  |  | CYP20A1             | Down | 0.71937 | 0.00191 |

Supplemental Table 2 footnotes:

- <sup>1</sup> Positive and negative associations with response reflect higher and lower expression levels of specific genes between the most sensitive and least sensitive cell line quartiles, respectively.
- <sup>2</sup> Fold-changes represent ratios of mean expression levels of individual genes between most sensitive and least sensitive cell line quartiles.
- <sup>3</sup> The indicated 9 genes were shared by eribulin and vinorelbine. No genes were shared between eribulin and paclitaxel.
- <sup>4</sup> Only one gene was shared by paclitaxel and vinorelbine.

| Supplemental Table 3: 100-gene networks identified by network propagation from eribulin and vinorelbine UFG sets |                          |                           |                     |                   |                          |                           |                     |
|------------------------------------------------------------------------------------------------------------------|--------------------------|---------------------------|---------------------|-------------------|--------------------------|---------------------------|---------------------|
| Eribulin                                                                                                         |                          |                           |                     | Vinorelbine       |                          |                           |                     |
| Gene <sup>1</sup>                                                                                                | Network Enrichment Score | Original UFG <sup>2</sup> | Shared <sup>3</sup> | Gene <sup>1</sup> | Network Enrichment Score | Original UFG <sup>2</sup> | Shared <sup>3</sup> |
| BICC1                                                                                                            | 4.42064                  | Yes                       |                     | VSIG10            | 2.41402                  | Yes                       |                     |
| IRX2                                                                                                             | 4.32646                  | Yes                       |                     | GSTT2             | 2.39356                  | Yes                       |                     |
| DAAM1                                                                                                            | 3.85316                  | Yes                       |                     | PEAR1             | 2.37939                  | Yes                       |                     |
| OSBPL1A                                                                                                          | 3.83710                  | Yes                       |                     | RAP1GAP2          | 2.36900                  | Yes                       |                     |
| KRT16                                                                                                            | 3.25369                  | Yes                       |                     | STEAP2            | 2.36125                  | Yes                       |                     |
| CD70                                                                                                             | 2.71230                  | Yes                       |                     | GSTT2B            | 2.34978                  | Yes                       |                     |
| ARRB1                                                                                                            | 2.05881                  | Yes                       |                     | PREX1             | 2.27950                  | Yes                       |                     |
| SLC15A2                                                                                                          | 0.07794                  |                           |                     | PRSS3             | 2.24421                  | Yes                       |                     |
| RANBP6                                                                                                           | 0.05975                  |                           |                     | SH2B2             | 2.19373                  | Yes                       |                     |
| UBR2                                                                                                             | 0.05797                  |                           |                     | NGEF              | 2.12363                  | Yes                       |                     |
| B3GALT4                                                                                                          | 0.05622                  |                           |                     | SEPTIN10          | 2.00180                  | Yes                       |                     |
| UBR1                                                                                                             | 0.05550                  |                           |                     | TRIP10            | 1.81447                  | Yes                       |                     |
| DVL1                                                                                                             | 0.05483                  |                           |                     | EPHA2             | 1.41570                  | Yes                       |                     |
| PIFO                                                                                                             | 0.05482                  |                           |                     | GSTP1             | 0.06740                  |                           |                     |
| SERHL2                                                                                                           | 0.05475                  |                           |                     | SHC1              | 0.04757                  |                           |                     |
| BAALC                                                                                                            | 0.05419                  |                           |                     | THEM4             | 0.04383                  |                           |                     |
| TFG                                                                                                              | 0.05415                  |                           |                     | ZPLD1             | 0.04337                  |                           |                     |
| DMD                                                                                                              | 0.05380                  |                           |                     | ZAP70             | 0.03793                  |                           |                     |
| OSBPL2                                                                                                           | 0.05324                  |                           |                     | TFPI              | 0.03533                  |                           |                     |
| AMBP                                                                                                             | 0.05237                  |                           |                     | TRIM25            | 0.03469                  |                           | Yes                 |
| POLG2                                                                                                            | 0.05209                  |                           |                     | SH2B1             | 0.03466                  |                           |                     |
| FBXL16                                                                                                           | 0.05147                  |                           |                     | BZW1              | 0.03407                  |                           |                     |
| SLC37A3                                                                                                          | 0.05110                  |                           |                     | CARD9             | 0.03393                  |                           |                     |
| RHOD                                                                                                             | 0.05093                  |                           |                     | SYK               | 0.03364                  |                           |                     |
| BSPRY                                                                                                            | 0.05075                  |                           |                     | SLC12A8           | 0.03364                  |                           |                     |
| FBXL14                                                                                                           | 0.05073                  |                           |                     | SIRT2             | 0.03356                  |                           |                     |
| MAPK3                                                                                                            | 0.05066                  |                           |                     | HNRNPL            | 0.03340                  |                           | Yes                 |
| CTNNA3                                                                                                           | 0.04927                  |                           |                     | EPOR              | 0.03312                  |                           |                     |
| CEP152                                                                                                           | 0.04923                  |                           |                     | DPEP1             | 0.03295                  |                           |                     |
| BIN3                                                                                                             | 0.04819                  |                           |                     | XPO1              | 0.03276                  |                           |                     |
| PEA15                                                                                                            | 0.04783                  |                           |                     | SORBS1            | 0.03215                  |                           |                     |
| AHSA1                                                                                                            | 0.04769                  |                           |                     | C7ORF25           | 0.03161                  |                           |                     |
| RHOC                                                                                                             | 0.04662                  |                           |                     | STAT3             | 0.03160                  |                           |                     |
| C9ORF41                                                                                                          | 0.04653                  |                           |                     | ERBB2             | 0.03151                  |                           |                     |
| TSC22D2                                                                                                          | 0.04558                  |                           |                     | CBL               | 0.03125                  |                           |                     |
| CAPZA2                                                                                                           | 0.04525                  |                           |                     | NMD3              | 0.03096                  |                           |                     |
| TMEM185A                                                                                                         | 0.04494                  |                           |                     | SH2D1A            | 0.03086                  |                           |                     |
| ZNF331                                                                                                           | 0.04441                  |                           |                     | KIT               | 0.03066                  |                           |                     |
| GNAZ                                                                                                             | 0.04352                  |                           |                     | RICTOR            | 0.03065                  |                           |                     |
| CENPF                                                                                                            | 0.04352                  |                           |                     | SEPT14            | 0.03059                  |                           |                     |
| EEA1                                                                                                             | 0.04316                  |                           |                     | SEPT12            | 0.03047                  |                           |                     |
| ARMC6                                                                                                            | 0.04261                  |                           |                     | ELAVL1            | 0.03036                  |                           |                     |
| KIFAP3                                                                                                           | 0.04221                  |                           |                     | AKT1              | 0.03011                  |                           |                     |
| RAB5B                                                                                                            | 0.04097                  |                           |                     | SEPT4             | 0.02995                  |                           |                     |
| GPN3                                                                                                             | 0.04027                  |                           |                     | SEPT1             | 0.02980                  |                           |                     |
| PCNA                                                                                                             | 0.04018                  |                           |                     | MRS2              | 0.02958                  |                           |                     |
| HEXIM1                                                                                                           | 0.03969                  |                           |                     | NTRK1             | 0.02957                  |                           |                     |
| TUBB                                                                                                             | 0.03909                  |                           |                     | SEPT3             | 0.02942                  |                           |                     |
| TUBA4A                                                                                                           | 0.03879                  |                           |                     | ACTR10            | 0.02934                  |                           |                     |
| BCL6                                                                                                             | 0.03762                  |                           |                     | CDC42EP4          | 0.02924                  |                           |                     |
| MAP3K7                                                                                                           | 0.03717                  |                           |                     | EPHA4             | 0.02915                  |                           |                     |
| VAPB                                                                                                             | 0.03662                  |                           |                     | SEPT8             | 0.02905                  |                           |                     |
| AURKB                                                                                                            | 0.03606                  |                           |                     | FAM118B           | 0.02898                  |                           |                     |
| MTNR1B                                                                                                           | 0.03576                  |                           | Yes                 | PDGFRB            | 0.02896                  |                           |                     |
| PRPF40A                                                                                                          | 0.03560                  |                           |                     | ITSN1             | 0.02877                  |                           |                     |
| PRPF31                                                                                                           | 0.03538                  |                           |                     | INSR              | 0.02873                  |                           |                     |



|         |         |  |     |           |         |  |     |
|---------|---------|--|-----|-----------|---------|--|-----|
| RHOA    | 0.03518 |  |     | PPP1R14B  | 0.02859 |  |     |
| NPM1    | 0.03504 |  |     | ESR2      | 0.02847 |  | Yes |
| EP300   | 0.03503 |  |     | JAK2      | 0.02840 |  |     |
| KRT82   | 0.03499 |  |     | GRB2      | 0.02827 |  |     |
| CHD2    | 0.03460 |  |     | TAF1D     | 0.02823 |  |     |
| PIK3R2  | 0.03447 |  |     | MYC       | 0.02805 |  |     |
| IRF4    | 0.03367 |  |     | SEPT5     | 0.02798 |  |     |
| VAPA    | 0.03358 |  |     | INPPL1    | 0.02792 |  |     |
| INVS    | 0.03342 |  |     | HCK       | 0.02785 |  |     |
| YY1     | 0.03307 |  |     | MTOR      | 0.02768 |  |     |
| HIF1AN  | 0.03281 |  |     | MRPL44    | 0.02753 |  |     |
| ZEB1    | 0.03279 |  |     | LINC01587 | 0.02750 |  |     |
| ESR2    | 0.03254 |  | Yes | C8ORF33   | 0.02750 |  |     |
| PTPRN2  | 0.03246 |  |     | ACTR1B    | 0.02740 |  |     |
| HNRNPL  | 0.03245 |  | Yes | SEPT6     | 0.02731 |  |     |
| TRIM25  | 0.03222 |  | Yes | SEPT11    | 0.02703 |  |     |
| BCL3    | 0.03206 |  |     | CTCF      | 0.02699 |  |     |
| KRT10   | 0.03181 |  |     | SPDL1     | 0.02698 |  |     |
| POU2F2  | 0.03176 |  |     | RPTOR     | 0.02650 |  |     |
| BCL11A  | 0.03171 |  |     | YWHAZ     | 0.02650 |  |     |
| SMC3    | 0.03155 |  |     | MTNR1B    | 0.02640 |  | Yes |
| MEF2A   | 0.03137 |  |     | PSMB5     | 0.02639 |  |     |
| BATF    | 0.03134 |  |     | PRKCD     | 0.02636 |  |     |
| SP1     | 0.03101 |  |     | RC3H1     | 0.02627 |  |     |
| PAX5    | 0.03098 |  |     | YWHAE     | 0.02608 |  |     |
| NFKB1   | 0.03091 |  |     | RPS6KB2   | 0.02598 |  |     |
| NFYA    | 0.03064 |  |     | WDR83     | 0.02594 |  |     |
| RAD21   | 0.03059 |  |     | LRCH3     | 0.02585 |  |     |
| EBF1    | 0.03040 |  |     | SEPT2     | 0.02580 |  |     |
| CFTR    | 0.03036 |  |     | SEPT7     | 0.02564 |  |     |
| TBP     | 0.03021 |  |     | PRKCI     | 0.02554 |  |     |
| KRT5    | 0.03005 |  |     | PSME4     | 0.02533 |  |     |
| SPI1    | 0.03003 |  |     | HDGF      | 0.02527 |  |     |
| CDH1    | 0.03000 |  |     | ZFP36L2   | 0.02521 |  |     |
| TCF12   | 0.02991 |  |     | TFAP4     | 0.02513 |  |     |
| TNIP2   | 0.02941 |  |     | TGS1      | 0.02505 |  |     |
| EFTUD2  | 0.02884 |  |     | ALB       | 0.02501 |  |     |
| CUL3    | 0.02872 |  |     | RGS3      | 0.02498 |  |     |
| HNRNPM  | 0.02871 |  |     | DPF2      | 0.02489 |  |     |
| EGFR    | 0.02857 |  |     | NEDD1     | 0.02476 |  |     |
| MAP2K3  | 0.02844 |  |     | HK2       | 0.02469 |  |     |
| HNRNPA1 | 0.02835 |  |     | SEPT9     | 0.02450 |  |     |
| NPHP1   | 0.02832 |  |     | YTHDC1    | 0.02407 |  |     |
| UBASH3B | 0.02825 |  |     | PPP1CA    | 0.02406 |  |     |

Supplemental Table 3 footnotes:

<sup>1</sup> Listed in order of decreasing network enrichment score.

<sup>2</sup> 7/9 eribulin UFGs and 13/13 vinorelbine UFGs were captured in the network propagation analyses. The 2 uncaptured eribulin UFGs were C5ORF38 and GPR157.

<sup>3</sup> Shared between eribulin and vinorelbine.
